# Supplementary material for: Determination of l-glutathione by spot test and spectrophotometric methods based on its interaction with phenazine
Source: Royal Society of Chemistry journal article supplement (doi:10.1039/d1ay00581b), 2021-01-01
Supplement: d1ay00581b1.pdf [file d1ay00581b1.pdf]

Determination of L-glutathione by spot test and spectrophotometric methods based on its interaction with phenazine

Alina Kalyniukova<sup>a\*</sup>, Yaroslav Studenyak<sup>b</sup>, Zoltán Cziáky<sup>c</sup>, József Jekő<sup>c,d</sup>, József Balogh<sup>b,d</sup>

<sup>a</sup>*Faculty of Forestry and Wood Sciences, Czech University of Life Sciences Prague, Prague, Czech Republic.*

<sup>b</sup>*Department of Analytical Chemistry, Uzhhorod National University, Uzhhorod, Ukraine.*

<sup>c</sup>*Agricultural and Molecular Research and Service Institute, University of Nyíregyháza, Nyíregyháza, Hungary.*

<sup>d</sup>*Department of Chemistry, University of Nyíregyháza, Nyíregyháza, Hungary.*

\*Corresponding author

*Alina Kalyniukova*

*Faculty of Forestry and Wood Sciences, Czech University of Life Sciences Prague, Kamýcka 129, 165 000, Prague, 165 00*

*Prague 6 – Suchbát, Czech Republic, tel: +420739908762.*

*e-mail: [adyuzheva@gmail.com](mailto:adyuzheva@gmail.com)*

Supporting Information

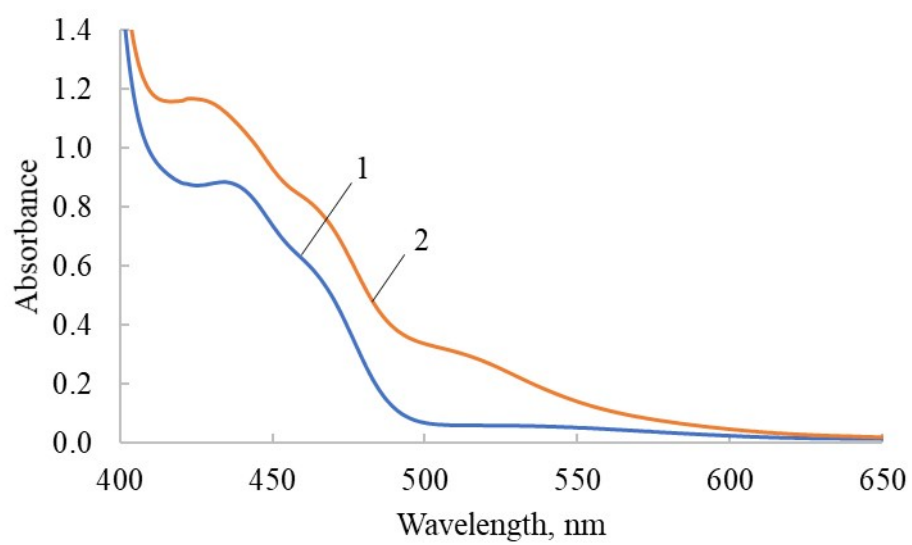

**Fig. S1** UV-Vis spectra of PHNZ (1) and PHNZ-GSH (2). (Concentration of PHNZ  $100 \mu\text{g mL}^{-1}$ , concentration of GSH  $40 \mu\text{g mL}^{-1}$ , temperature  $80 \text{ }^\circ\text{C}$ , time 20 min, pH 6)

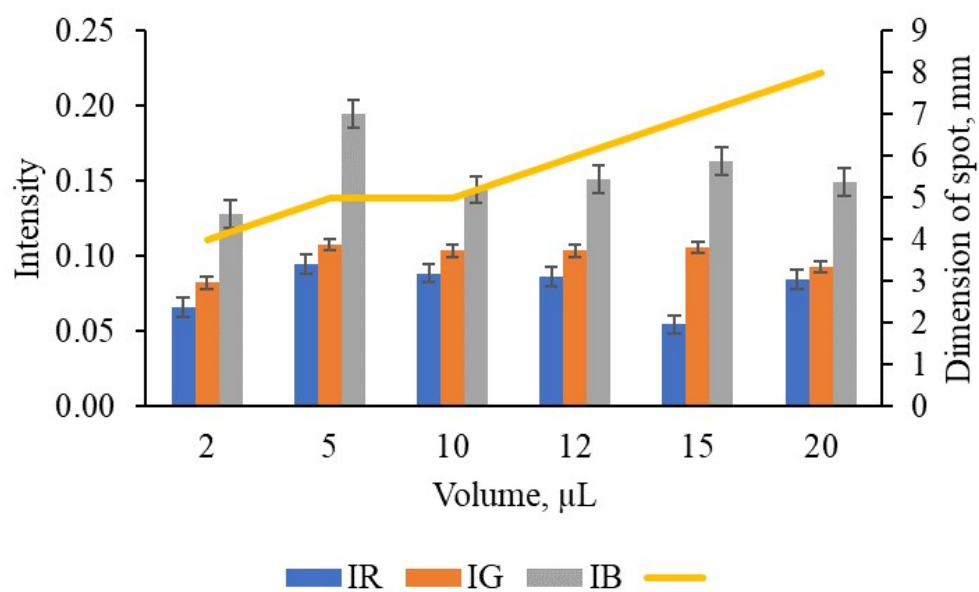

**Fig. S2** Selection of reagents volume and dimension of spot, (concentration of PHNZ –  $500 \mu\text{g mL}^{-1}$ , concentration of GSH –  $100 \mu\text{g mL}^{-1}$ , volume of PHNZ and GSH –  $5 \mu\text{L}$ ).

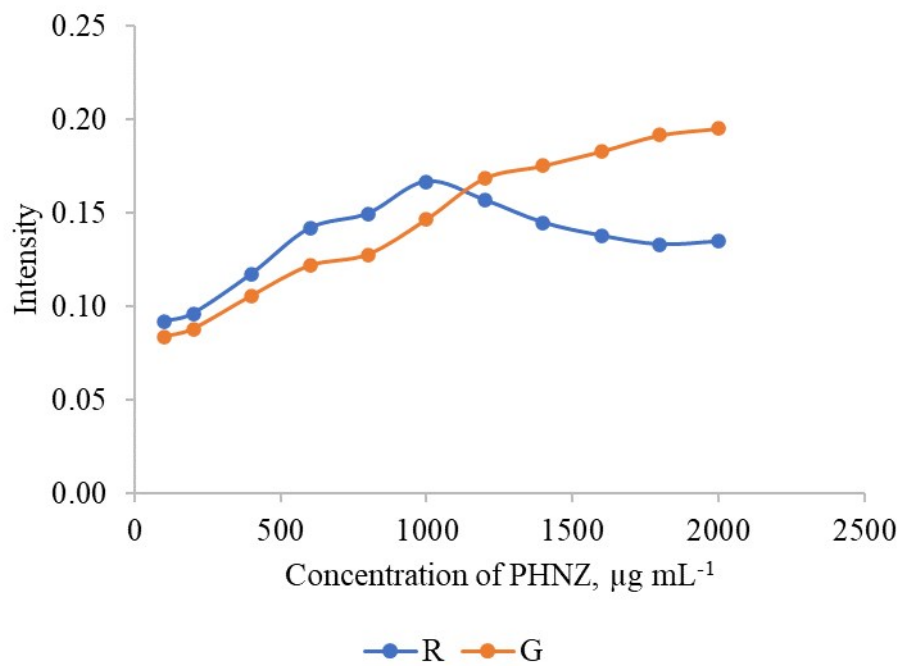

**Fig. S3** Selection of PHNZ concentration (concentration of GSH –  $100 \mu\text{g mL}^{-1}$ , volume of PHNZ and GSH –  $5 \mu\text{L}$ ).

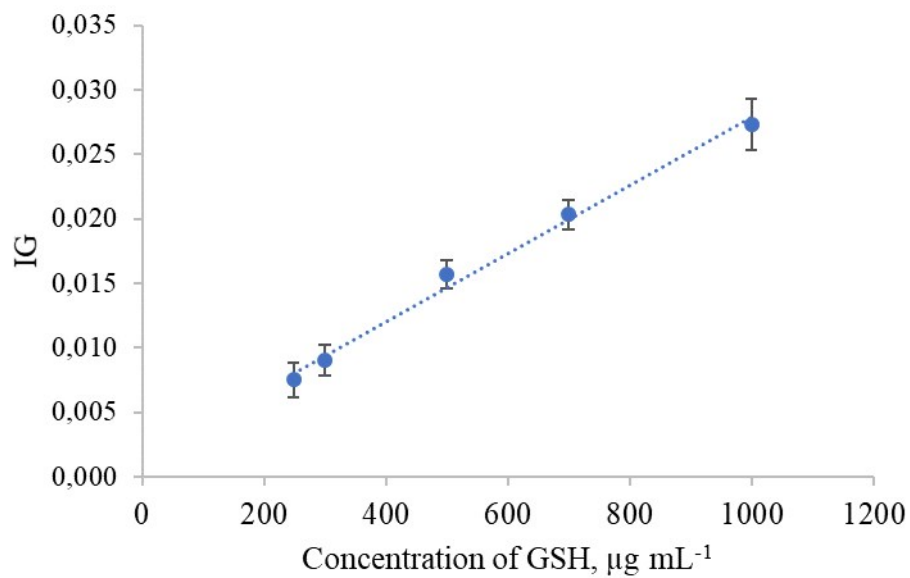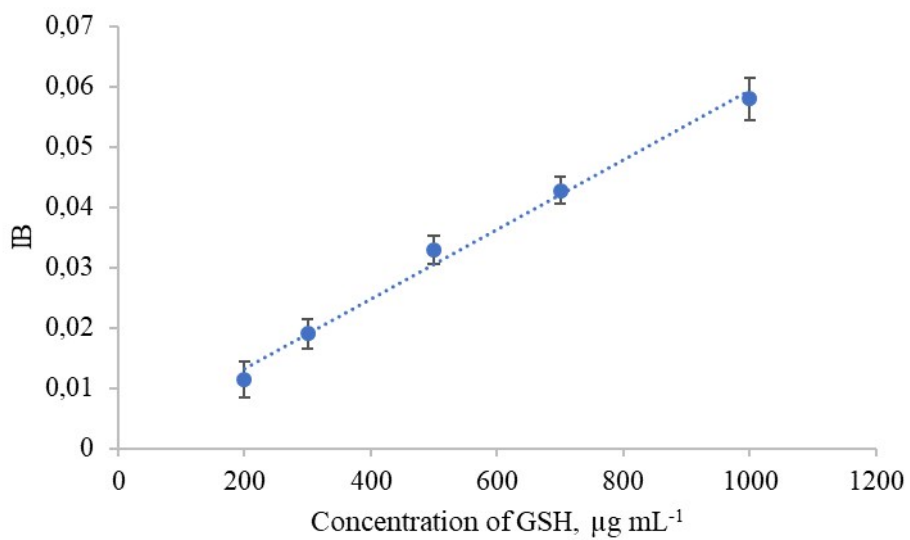

**Fig. S4** Calibration curve for B and G channels (Concentration of PHNZ –  $100 \mu\text{g mL}^{-1}$ , volume of PHNZ and GSH –  $5 \mu\text{L}$ ).

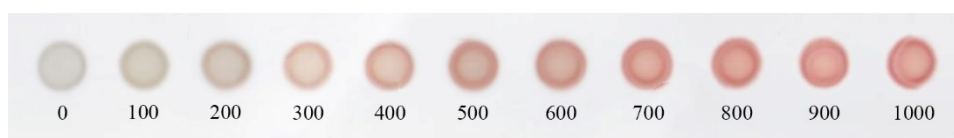

**Fig. S5** A spot test platform spotted with increasing concentrations of GSH in the range 0-1000  $\mu\text{g mL}^{-1}$  (Spot test platform – TLC, concentration of PHNZ – 1200  $\mu\text{g mL}^{-1}$ , volume of PHNZ and GSH – 5  $\mu\text{L}$ ).

**Table S1** Green Analytical Procedure Index parameters

| <b>Category</b>             | <b>Description</b>           | <b>Color for spot test method</b> | <b>Color for spectrophotometric method</b> |
|-----------------------------|------------------------------|-----------------------------------|--------------------------------------------|
| <b>Sample preparation</b>   |                              |                                   |                                            |
| Collection (1)              | None                         | Green                             | Green                                      |
| Preservation (2)            | None                         | Green                             | Green                                      |
| Transport (3)               | None                         | Green                             | Green                                      |
| Storage (4)                 | None                         | Green                             | Green                                      |
| Type of method (5)          | Extraction does not required | Yellow                            | Yellow                                     |
| Scale of extraction (6)     | Non-extraction               | Green                             | Green                                      |
| Solvent used (7)            | Green solvent                | Green                             | Green                                      |
| Additional treatment (8)    | None                         | Green                             | Green                                      |
| <b>Reagent and solvents</b> |                              |                                   |                                            |
| Amount (9)                  | 10-100 mL (10-100 g)         | Green                             | Yellow                                     |
| Health hazard (10)          | Slightly toxic               | Green                             | Green                                      |
| Safety hazard (11)          | No special hazard            | Green                             | Green                                      |
| <b>Instrumentation</b>      |                              |                                   |                                            |
| Energy (12)                 | ≤0.1 kWh per sample          | Green                             | Green                                      |
| Occupational hazard (13)    | -                            | Yellow                            | Yellow                                     |
| Waste (14)                  | 1–10 mL (1–10 g)             | Yellow                            | Yellow                                     |
| Waste treatment (15)        | None                         | Red                               | Red                                        |
